# Supplementary material for: Improving insect conservation across heterogeneous landscapes using species–habitat networks
Source: PeerJ. 2021 Jan 5;9:e10563. doi: 10.7717/peerj.10563 (PMC7792512; doi:10.7717/peerj.10563)
Supplement: Supplemental Information 6 — The species–habitat network, with butterfly species on columns and sites with the indication of habitat type on rows. [file peerj-09-10563-s006.xlsx]

## Sheet: raw_data
habitat	site	Iphiclides_podalirius	Papilio_machaon	Anthocharis_cardamines	Pieris_ergane	Pieris_mannii	Pieris_napi	Pieris_rapae	Pontia_edusa	Leptidea_sinapis	Colias_alfacariensis	Colias_hyale	Colias_croceus	Gonepteryx_rhamni	Thecla_betulae	Satyrium_spini	Callophrys_rubi	Lycaena_alciphron	Lycaena_dispar	Lycaena_phlaeas	Lycaena_tityrus	Celastrina_argiolus	Cupido_minimus	Cupido_argiades	Glaucopsyche_alexis	Pseudophilotes_vicrama	Maculinea_alcon	Aricia_agestis	Plebejus_argus	Plebejus_argyrognomon	Plebejus_idas	Polyommatus_bellargus	Polyommatus_coridon	Polyommatus_dorylas	Polyommatus_icarus	Apatura_ilia	Vanessa_atalanta	Vanessa_cardui	Inachis_io	Aglais_urticae	Polygonia_c-album	Melitaea_athalia	Melitaea_aurelia	Melitaea_didyma	Melitaea_diamina	Melitaea_cinxia	Melitaea_phoebe	Issoria_lathonia	Argynnis_paphia
evolved_grassland	eg1	0	0	0	0	0	0	1	5	3	21	0	1	0	0	1	2	0	0	0	0	0	0	0	0	0	0	0	0	0	0	62	0	0	11	0	0	0	0	0	0	0	0	9	0	0	2	0	0
disturbed_grassland	dg1	0	1	0	0	0	0	3	6	0	0	0	0	0	0	0	0	0	0	0	0	0	0	0	0	0	0	0	0	0	0	0	0	0	0	0	0	0	0	0	0	0	0	0	0	0	0	0	0
continuous_grassland	cg1	1	0	0	1	5	0	11	2	0	0	0	0	0	0	0	0	0	0	0	0	0	0	0	0	0	0	0	0	0	0	0	0	0	0	0	1	2	0	0	0	0	0	0	0	0	0	1	0
hay_meadow	hm1	0	4	1	0	0	4	6	0	3	0	0	7	1	0	0	0	0	0	2	1	0	0	0	0	0	1	0	7	0	0	5	0	0	6	0	0	0	0	0	2	4	0	5	0	0	0	0	1
hay_meadow	hm2	0	1	1	0	0	2	5	0	3	0	0	4	1	0	0	0	0	0	1	0	1	0	2	0	0	0	2	49	0	0	0	0	0	28	0	0	0	0	0	1	18	6	10	0	0	2	0	1
hay_meadow	hm3	0	2	3	0	0	1	6	0	2	0	0	4	1	1	0	0	0	0	1	0	0	0	4	0	0	0	2	35	7	0	0	0	0	12	0	0	0	0	0	3	13	6	1	0	0	9	1	1
hay_meadow	hm4	0	1	4	0	0	2	5	0	4	0	0	4	0	4	0	0	0	0	0	0	0	0	0	0	0	0	2	11	0	0	0	0	0	29	0	0	0	0	0	0	14	0	17	0	0	0	3	0
continuous_grassland	cg2	0	6	0	0	0	1	2	5	0	8	0	1	0	0	0	0	0	0	0	0	0	3	1	0	1	0	0	0	0	0	1	0	0	6	0	0	0	0	0	0	0	0	0	0	1	13	0	0
evolved_grassland	eg2	0	1	0	0	0	0	1	2	0	1	0	0	0	0	0	0	0	0	0	0	0	1	0	0	0	0	1	0	0	0	4	0	0	0	4	0	0	0	0	0	0	0	1	0	0	1	0	0
continuous_grassland	cg3	0	9	0	0	0	0	0	4	0	6	0	0	0	0	0	0	0	0	0	0	0	1	0	0	0	0	0	0	0	0	0	0	0	1	0	0	0	0	2	0	0	0	0	0	0	6	0	0
evolved_grassland	eg3	0	5	0	0	0	0	0	14	11	11	0	1	2	0	0	0	0	0	0	0	0	0	0	0	0	0	0	0	0	0	4	0	0	0	0	0	0	0	0	0	0	0	1	0	0	13	0	0
continuous_grassland	cg4	0	4	1	0	0	0	4	4	14	1	0	1	0	0	0	0	0	0	1	0	0	0	0	0	0	0	0	2	0	0	0	0	0	1	0	0	0	0	0	0	0	0	0	0	0	0	0	0
evolved_grassland	eg4	2	4	5	10	0	0	11	7	18	10	0	1	2	0	0	0	0	0	0	0	0	1	0	0	0	0	2	6	0	0	6	0	2	6	0	0	0	0	0	0	11	0	3	0	0	5	5	0
evolved_grassland	eg5	0	0	5	0	0	0	2	0	27	0	0	0	0	0	4	1	0	0	1	0	1	16	0	0	3	0	0	1	0	0	11	0	2	3	0	0	0	0	0	0	0	0	2	0	4	0	0	0
evolved_grassland	eg6	0	2	3	0	0	0	2	0	7	2	0	0	0	0	2	3	0	0	0	0	0	3	0	1	0	0	0	0	0	0	9	1	0	7	0	0	0	0	0	0	0	0	0	0	1	0	0	0
evolved_grassland	eg7	0	0	0	0	0	0	4	1	18	0	0	0	0	0	0	0	0	0	0	0	0	3	0	0	0	0	0	7	0	0	9	0	3	5	0	0	0	0	0	0	0	3	5	0	4	2	0	0
evolved_grassland	eg8	0	0	6	0	0	3	4	1	27	2	0	2	2	0	0	0	0	0	3	0	1	3	0	0	0	0	0	7	0	0	12	0	9	15	0	0	0	0	0	0	0	4	12	0	4	5	0	0
disturbed_grassland	dg2	0	1	0	0	0	0	1	9	0	0	0	0	1	0	0	0	0	0	0	0	0	0	0	0	0	0	0	0	0	0	0	0	0	0	0	0	0	0	0	0	0	0	0	0	0	0	0	0
disturbed_grassland	dg3	0	1	0	0	0	2	0	2	0	2	0	1	0	0	0	0	0	0	0	0	0	0	0	0	0	0	0	0	0	0	0	0	0	0	0	0	0	0	0	0	0	0	0	0	0	0	0	0
disturbed_grassland	dg4	0	0	0	0	0	2	0	5	0	3	0	1	0	0	0	0	0	0	0	0	0	0	0	0	0	0	0	0	0	0	0	0	0	0	0	0	0	0	0	0	0	0	0	0	0	0	1	0
disturbed_grassland	dg5	0	0	0	0	0	0	1	3	0	1	0	0	0	0	0	0	0	0	0	0	0	0	0	0	0	0	0	0	0	0	0	0	0	0	0	0	2	0	0	0	0	0	0	0	0	0	0	0
disturbed_grassland	dg6	0	0	0	0	0	2	2	3	0	0	0	0	0	0	0	0	0	0	0	0	0	0	0	0	0	0	0	0	0	0	0	0	0	0	0	0	0	0	0	0	0	0	0	0	0	0	1	0
disturbed_grassland	dg7	0	0	0	0	0	1	2	0	0	0	0	0	0	0	0	0	0	0	0	0	0	0	0	0	0	0	0	0	0	0	0	0	0	0	0	0	1	0	0	0	0	0	0	0	0	0	0	0
disturbed_grassland	dg8	1	0	0	0	0	0	0	1	0	0	0	0	0	0	0	0	0	0	0	0	0	0	0	0	0	0	0	0	0	0	0	0	0	0	0	0	0	0	0	0	0	0	0	0	0	0	0	0
disturbed_grassland	dg9	0	0	0	0	0	0	0	3	0	0	0	0	0	0	0	0	0	0	0	0	0	0	0	0	0	0	0	0	0	0	0	0	0	0	0	0	0	0	0	0	0	0	0	0	0	0	0	0
disturbed_grassland	dg10	0	1	0	0	0	0	0	0	0	1	0	0	0	0	0	0	0	0	0	0	0	0	0	0	0	0	0	0	0	0	0	0	0	0	0	0	0	0	0	0	0	0	0	0	0	0	0	0
evolved_grassland	eg9	1	0	0	0	0	0	7	0	11	1	0	0	0	0	0	0	0	0	2	0	0	0	1	0	0	0	0	2	0	0	11	0	0	14	0	0	1	0	0	0	0	0	1	0	0	0	0	0
continuous_grassland	cg5	0	1	0	0	0	3	0	16	0	0	0	0	0	0	0	0	0	0	0	0	0	0	0	0	0	0	0	0	0	0	6	0	0	1	0	0	0	0	0	0	0	0	0	0	0	1	0	0
continuous_grassland	cg6	0	0	0	11	1	3	4	16	10	0	0	8	0	0	0	0	1	0	0	0	0	0	0	0	1	0	4	0	0	0	3	0	7	22	0	0	0	0	0	0	0	0	0	0	0	6	3	0
continuous_grassland	cg7	0	0	0	0	0	0	11	10	18	11	0	8	0	0	0	1	0	0	0	0	0	1	0	0	1	0	2	57	0	0	18	0	0	32	0	0	0	0	0	0	0	0	10	0	0	1	0	0
continuous_grassland	cg8	0	9	0	0	0	0	0	7	4	6	0	2	0	0	0	1	0	0	0	0	0	0	1	0	0	0	2	21	0	0	10	0	0	9	0	0	0	0	0	0	0	0	4	0	0	2	0	0
wet_meadow	wm1	0	0	2	0	0	2	0	0	3	0	0	0	2	0	0	0	0	0	0	0	0	0	0	0	0	0	0	0	0	0	0	0	0	0	1	2	0	1	0	0	0	0	0	0	0	0	0	1
wet_meadow	wm2	0	3	1	0	0	2	16	1	4	0	0	0	3	0	0	0	0	0	1	1	0	0	1	0	0	0	0	0	0	0	0	0	0	5	0	0	0	1	0	0	3	0	3	0	0	2	2	1
hay_meadow	hm5	0	3	0	0	0	2	7	0	4	0	4	7	2	0	0	0	0	0	0	0	0	0	0	0	0	0	6	19	16	0	0	0	0	22	0	0	1	0	0	0	30	4	1	0	0	12	0	0
wet_meadow	wm3	0	0	0	0	0	1	1	0	1	0	0	0	8	0	0	0	0	0	0	0	3	0	0	0	0	0	0	0	0	0	0	0	0	1	4	0	0	0	0	0	1	0	0	11	0	0	0	0
hay_meadow	hm6	0	2	0	0	0	4	0	0	0	0	0	1	6	0	0	0	0	0	0	0	0	0	2	0	0	0	0	0	0	0	0	0	0	14	0	0	1	1	0	1	2	1	0	0	0	2	0	0
hay_meadow	hm7	0	1	0	0	0	1	1	0	2	3	0	0	1	0	0	1	0	0	2	0	1	0	1	0	0	0	3	0	0	0	6	0	0	4	2	0	0	0	0	0	14	1	2	5	0	9	0	0
wet_meadow	wm4	0	0	0	0	0	2	3	0	1	0	0	0	3	0	0	0	0	0	0	0	0	0	0	0	0	0	0	0	0	0	0	0	0	0	0	0	0	0	0	0	0	0	0	0	0	0	0	0
wet_meadow	wm5	0	0	0	0	0	4	7	0	2	2	1	0	2	0	0	0	0	11	1	0	1	0	1	0	0	0	0	0	0	0	0	0	0	5	4	1	0	0	0	1	0	0	0	81	0	5	0	0
wet_meadow	wm6	0	0	0	0	0	2	5	0	3	0	0	0	9	0	0	1	0	0	0	0	0	0	2	0	0	0	0	0	0	2	0	0	0	0	0	0	2	2	0	0	0	0	0	24	0	0	0	0
continuous_grassland	cg9	0	2	0	0	0	0	1	21	4	15	0	1	0	0	0	0	0	0	0	0	0	8	0	0	2	0	0	0	0	0	30	0	14	5	0	0	0	0	0	0	0	0	9	0	0	1	0	0
evolved_grassland	eg10	0	1	3	0	0	0	4	4	21	14	0	0	0	0	0	0	0	0	0	0	0	12	1	0	2	0	0	0	0	0	12	0	4	11	0	0	0	1	0	0	1	0	2	15	1	6	0	0
continuous_grassland	cg10	1	1	0	0	0	0	5	1	11	2	0	1	0	0	0	2	0	0	0	0	0	0	2	0	0	0	1	1	0	0	3	0	0	8	0	0	0	0	0	0	0	0	1	0	0	8	1	0
wet_meadow	wm7	3	0	0	0	0	0	3	0	21	0	1	0	0	0	0	1	0	0	1	0	0	2	0	0	0	0	3	4	0	5	0	0	0	4	0	0	0	0	0	1	5	0	0	1	0	0	0	0
[truncated: 26 more columns]
